# Supplementary material for: The cytochrome bd-I respiratory oxidase augments survival of multidrug-resistant Escherichia coli during infection
Source: PubMed Central journal article supplement (PMC5073308; doi:10.1038/srep35285), 2016-10-21
Supplement: srep35285-s1.pdf [file srep35285-s1.pdf]

## The cytochrome *bd*-I respiratory oxidase augments survival of multidrug-resistant *Escherichia coli* during infection

Mark Shepherd<sup>1\*</sup>, Maud E. S. Achard<sup>2,3</sup>, Adi Idris<sup>2,3†</sup>, Makrina Totsika<sup>2,3#</sup>, Minh-Duy Phan<sup>2,3</sup>, Kate M. Peters<sup>2,3</sup>, Sohinee Sarkar<sup>2,3#</sup>, Claudia A. Ribeiro<sup>1</sup>, Louise V. Holyoake<sup>1</sup>, Dimitrios Ladakis<sup>1</sup>, Glen C. Ulett<sup>4</sup>, Matthew J. Sweet<sup>5</sup>, Robert K. Poole<sup>6</sup>, Alastair G. McEwan<sup>2,3</sup>, Mark A. Schembri<sup>2,3\*</sup>

<sup>1</sup>School of Biosciences, University of Kent, Canterbury, CT2 7NJ, United Kingdom

<sup>2</sup>School of Chemistry and Molecular Biosciences, The University of Queensland, Brisbane, Queensland 4072, Australia

<sup>3</sup>Australian Infectious Disease Research Centre, The University of Queensland, Brisbane, Queensland 4072, Australia

<sup>4</sup>School of Medical Science, and Menzies Health Institute Queensland, Griffith University, Gold Coast, Queensland, 4222, Australia

<sup>5</sup>Institute for Molecular Bioscience (IMB) and IMB Centre for Inflammation and Disease Research, University of Queensland, Brisbane, Queensland 4072, Australia

<sup>6</sup>Department of Molecular Biology and Biotechnology, The University of Sheffield, Firth Court, Western Bank, Sheffield, S10 2TN, United Kingdom

\*[M.Shepherd@kent.ac.uk](mailto:M.Shepherd@kent.ac.uk); [m.schembri@uq.edu.au](mailto:m.schembri@uq.edu.au)

#Current address: Institute of Health and Biomedical Innovation, and School of Biomedical Sciences, Queensland University of Technology, Kelvin Grove, Queensland 4059, Australia.

†Current address: PAPRSB Institute of Health Science, Universiti Brunei Darussalam, Brunei Darussalam, BE1410

**Figure S1. Complementation of the *cydAB* mutant restores the *bd*-type spectroscopic signal**

Wild type, *cydAB*, and *cydAB*+ (complemented mutant – see Tables S2 and S3 for strains and plasmids) strains were grown in 250 mL conical flasks in 100 mL LB medium overnight at 37°C and 150 rpm. Cells (from 30 mL of culture) were harvested and CO difference spectra were recorded as previously described (Kalnenieks, *et al.* FEMS Microbiol. Lett. 1998;168(1):91-97). The expected spectral features for cytochrome *bd*-I are troughs at 430 nm, 442 nm, and 622 nm, and a peak at 642 nm (Kita *et al.* J. Biol. Chem. 259:3375-3381 (1984)).

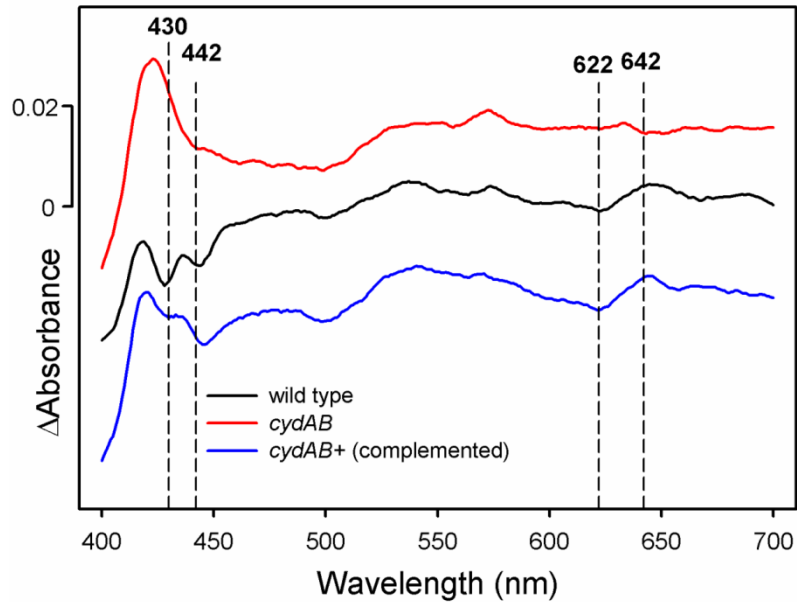



**Table S1. Mutagenesis primers**

| <b>Primer</b>      | <b>Sequence (5' – 3')</b>                                                                     | <b>Description</b>                                                                                                                                      | <b>Reference or source</b> |
|--------------------|-----------------------------------------------------------------------------------------------|---------------------------------------------------------------------------------------------------------------------------------------------------------|----------------------------|
| <i>cydA</i><br>CmF | <b>ATGATGTTAGATATAGTC<br/>GAACTGTCGCGCTTACAG<br/>TTTGCCCTTGACCGCGTGT<br/>AGGCTGGAGCTGCTTC</b> | Forward mutagenesis primer comprising 50 bases complementary to the start of <i>cydA</i> followed by 20 bases complementary to the Cm cassette of pKD3. | This work                  |
| <i>cydB</i><br>CmR | <b>TTAGTACAGAGAGTGGGT<br/>GTTACGTTCAATATCTTC<br/>TTTGGTGATACGACCATA<br/>TGAATATCCTCCTTAG</b>  | Reverse mutagenesis primer comprising 50 bases complementary to the end of <i>cydB</i> followed by 20 bases complementary to the Cm cassette of pKD3.   | This work                  |
| <i>hmp</i><br>CmF  | <b>ATGCTTGACGCTCAAACC<br/>ATCGCTACAGTAAAAGCC<br/>ACCATCCCTTTACTGTGTA<br/>GGCTGGAGCTGCTTC</b>  | Forward mutagenesis primer comprising 50 bases complementary to the start of <i>hmp</i> followed by 20 bases complementary to the Cm cassette of pKD3.  | This work                  |
| <i>hmp</i><br>CmR  | <b>TCACAGCACCTTATGCGG<br/>GCCAAAGCATTTCGTAATG<br/>AATGTTTTCTGTTTCATAT<br/>GAATATCCTCCTTAG</b> | Reverse mutagenesis primer comprising 50 bases complementary to the end of <i>hmp</i> followed by 20 bases complementary to the Cm cassette of pKD3.    | This work                  |
| <i>nrfA</i><br>CmF | <b>ATGACAAGGATAAAAATA<br/>AACGCACGCCGTATCTTC<br/>AGCTTATTGATTCCGTGTA<br/>GGCTGGAGCTGCTTC</b>  | Forward mutagenesis primer comprising 50 bases complementary to the start of <i>nrfA</i> followed by 20 bases complementary to the Cm cassette of pKD3. | This work                  |
| <i>nrfA</i><br>CmR | <b>TTATTGGCTTAAACAGACC<br/>GTTTTTACGTGCCTGCTC<br/>TTCCCACTGCGGGACATA<br/>TGAATATCCTCCTTAG</b> | Reverse mutagenesis primer comprising 50 bases complementary to the end of <i>nrfA</i> followed by 20 bases complementary to the Cm cassette of pKD3.   | This work                  |
| <i>norV</i><br>CmF | <b>ATGTCTATTGTGGTGAAA<br/>AATAACATTTCATTGGGTT<br/>GGTCAACGTGACTGGTGT<br/>AGGCTGGAGCTGCTTC</b> | Forward mutagenesis primer comprising 50 bases complementary to the start of <i>norV</i> followed by 20 bases complementary to the Cm cassette of pKD3. | This work                  |
| <i>norW</i><br>CmR | <b>GTTTTCAACAATCCAAAT<br/>GCCTCTTTCATCCGATCC<br/>TCACTGACCACAAACATA<br/>TGAATATCCTCCTTAG</b>  | Reverse mutagenesis primer comprising 50 bases complementary to the end of <i>norW</i> followed by 20 bases complementary to the Cm cassette of pKD3.   | This work                  |
| <i>ytfE</i><br>CmF | <b>ATGGCTTATCGCGACCAA<br/>CCTTTAGGTGAACTGGCG<br/>CTCTCTATCCCTCGGTGTA<br/>GGCTGGAGCTGCTTC</b>  | Forward mutagenesis primer comprising 50 bases complementary to the start of <i>ytfE</i> followed by 20 bases complementary to the Cm cassette of pKD3. | This work                  |
| <i>ytfE</i><br>CmR | <b>TTACTCACCCGCCAGCGC<br/>GCGTGGGAACAGTACATT<br/>GTTTTCCAGGCTGACATA<br/>TGAATATCCTCCTTAG</b>  | Reverse mutagenesis primer comprising 50 bases complementary to the end of <i>ytfE</i> followed by 20 bases complementary to the Cm cassette of pKD3.   | This work                  |

**Table S2. Cloning primers and plasmids**

| Strain                   | Sequence (5' – 3')                                                                                                                                                             | Description                                                                                 | Reference or source |
|--------------------------|--------------------------------------------------------------------------------------------------------------------------------------------------------------------------------|---------------------------------------------------------------------------------------------|---------------------|
| <i>cyd</i> F             | ACTCTCGGATCC<br>TTAAAGAGGAGAAAGGTACCGC<br>ATGTTAGATATAGTCGAACTGTCGC                                                                                                            | Forward cloning primer for <i>cydABX</i> and <i>ygbE</i> , contains BamHI site (underlined) | This work           |
| <i>cyd</i> R             | AGGGAGTCTAGAAATTTATGGGCC<br>TGACTCGG                                                                                                                                           | Reverse cloning primer for <i>cydABX</i> and <i>ygbE</i> , contains XbaI site (underlined)  | This work           |
| <i>hmp</i> F             | CGCGCGGATCCATTTTTCACTTCAT<br>CACATTCTTTCTGAAA                                                                                                                                  | Forward cloning primer for <i>hmp</i> , contains BamHI site (underlined)                    | This work           |
| <i>hmp</i> R             | CGCGCTGCGCATGCCGGATGTGTCC<br>ATCCGGCAACATCAAA                                                                                                                                  | Reverse cloning primer for <i>hmp</i> , contains FspI site (underlined)                     | This work           |
| Plasmid                  | Description                                                                                                                                                                    |                                                                                             | Reference or source |
| pSU2718-G                | A gentamycin resistance cassette was cloned into the chloramphenicol resistance cassette of vector pSU2718. For use in complementation studies in multidrug-resistant strains. |                                                                                             | This work           |
| pSU2718-G- <i>cydABX</i> | The <i>cydABX</i> operon (with ribosome binding site) and the downstream <i>ygbE</i> gene were cloned into the BamHI/XbaI sites of vector pSU2718-G.                           |                                                                                             | This work           |
| pSU2718-G- <i>hmp</i>    | The <i>hmp</i> gene, including 120 bp of native promoter, was cloned into the BamHI/FspI sites of vector pSU2718-G.                                                            |                                                                                             | This work           |

**Table S3. *E. coli* strains**

| Strain           | Description                                                  | Reference or source                                               |
|------------------|--------------------------------------------------------------|-------------------------------------------------------------------|
| EC958            | O25:H4-ST131. Multidrug-resistant (referred to as wild type) | Lau <i>et al.</i> J. Antimicrob. Chemother. 62: 1241-1244 (2008). |
| <i>cydAB</i>     | As EC958, except <i>cydAB</i> :: $\Omega$ Cm <sup>R</sup>    | This work                                                         |
| <i>hmp</i>       | As EC958, except <i>hmp</i> :: $\Omega$ Cm <sup>R</sup>      | This work                                                         |
| <i>norVW</i>     | As EC958, except <i>norVW</i> :: $\Omega$ Cm <sup>R</sup>    | This work                                                         |
| <i>nrfA</i>      | As EC958, except <i>nrfA</i> :: $\Omega$ Cm <sup>R</sup>     | This work                                                         |
| <i>ytfE</i>      | As EC958, except <i>ytfE</i> :: $\Omega$ Cm <sup>R</sup>     | This work                                                         |
| EC958 <i>lac</i> | As EC958, except <i>lacZ</i> :: $\Omega$ gfp                 | This work                                                         |
| CFT073           | Pyelonephritis isolate                                       | Mobley, H.L. <i>et al.</i> Infect. Immun. 58: 1281-1289 (1990).   |
| 83972            | Asymptomatic bacteriuria isolate                             | Andersson, P. <i>et al.</i> Infect. Immun. 59: 2915-2921 (1991).  |
| MG1655           | Nonpathogenic K12 strain                                     | Blattner, F.R. <i>et al.</i> Science 277, 1453-1462 (1997).       |
